# Supplementary material
Source: MDPI journal article supplement (https://www.mdpi.com/2311-5637/9/10/904)
Supplement: s1 [file s1]

**Table S1:** Composition and concentration of amino acids added to Pinot noir fermentations

| <b>Amino acid</b> | <b>Concentration (mg/L)</b> |
|-------------------|-----------------------------|
| Alanine           | 47                          |
| Arginine          | 308                         |
| Aspartic acid     | 27.5                        |
| Glutamic acid     | 86                          |
| Glycine           | 1.7                         |
| Histidine         | 21                          |
| Isolueucine       | 15                          |
| Leucine           | 16                          |
| Lysine            | 4.3                         |
| Phenylalanine     | 9.5                         |
| Proline           | 269                         |
| Serine            | 31                          |
| Threonine         | 27.3                        |
| Tryptophan        | 11.7                        |
| Tyrosine          | 2.5                         |
| Valine            | 19                          |
